# Supplementary material for: Monitoring alterations of all-trans-retinal in human brain cancer cells by label-free confocal Raman imaging: regulation of the redox status of cytochrome c
Source: Royal Society of Chemistry journal article supplement (doi:10.1039/d4ra01542h), 2024-01-01
Supplement: d4ra01542h1.pdf [file d4ra01542h1.pdf]

**Monitoring alterations of all-*trans*-retinal in human brain cancer cells by label-free confocal Raman imaging: regulation of redox status of cytochrome *c***

Karolina Jarczewska<sup>a</sup>, Monika Kopeć<sup>a</sup>, Halina Abramczyk<sup>a</sup>, Jakub Maciej Surmacki<sup>\*a</sup>

<sup>a</sup> Lodz University of Technology, Faculty of Chemistry, Institute of Applied Radiation Chemistry, Laboratory of Laser Molecular Spectroscopy, Wroblewskiego 15, 93-590 Lodz, Poland

\* Correspondence: jakub.surmacki@p.lodz.pl; Tel.: +48426313188

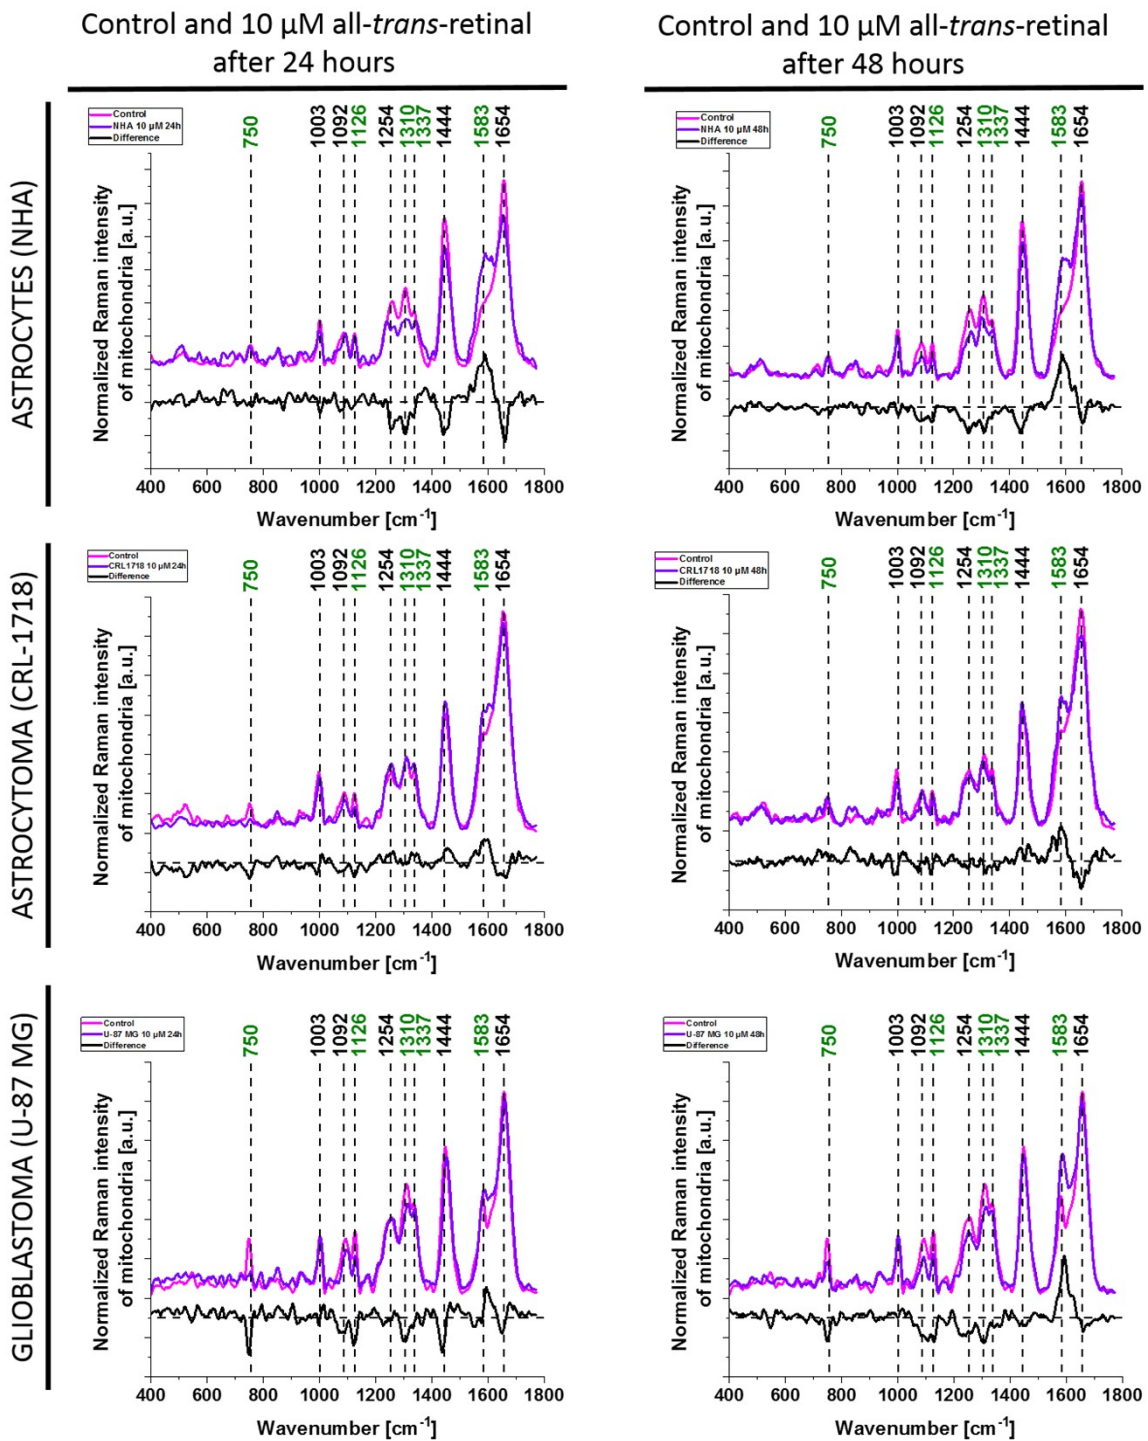

**Figure S1.** Average and difference spectra for cell mitochondria from NHA, CRL-1718 and U-87 MG cell lines, control and supplemented with 10  $\mu\text{M}$  all-*trans*-retinal of two incubation times: 24 (left) and 48 (right) hours. Magenta – average from control cells, purple – average from cells supplemented with 10  $\mu\text{M}$  all-*trans*-retinal, black – difference spectrum (supplemented – control).

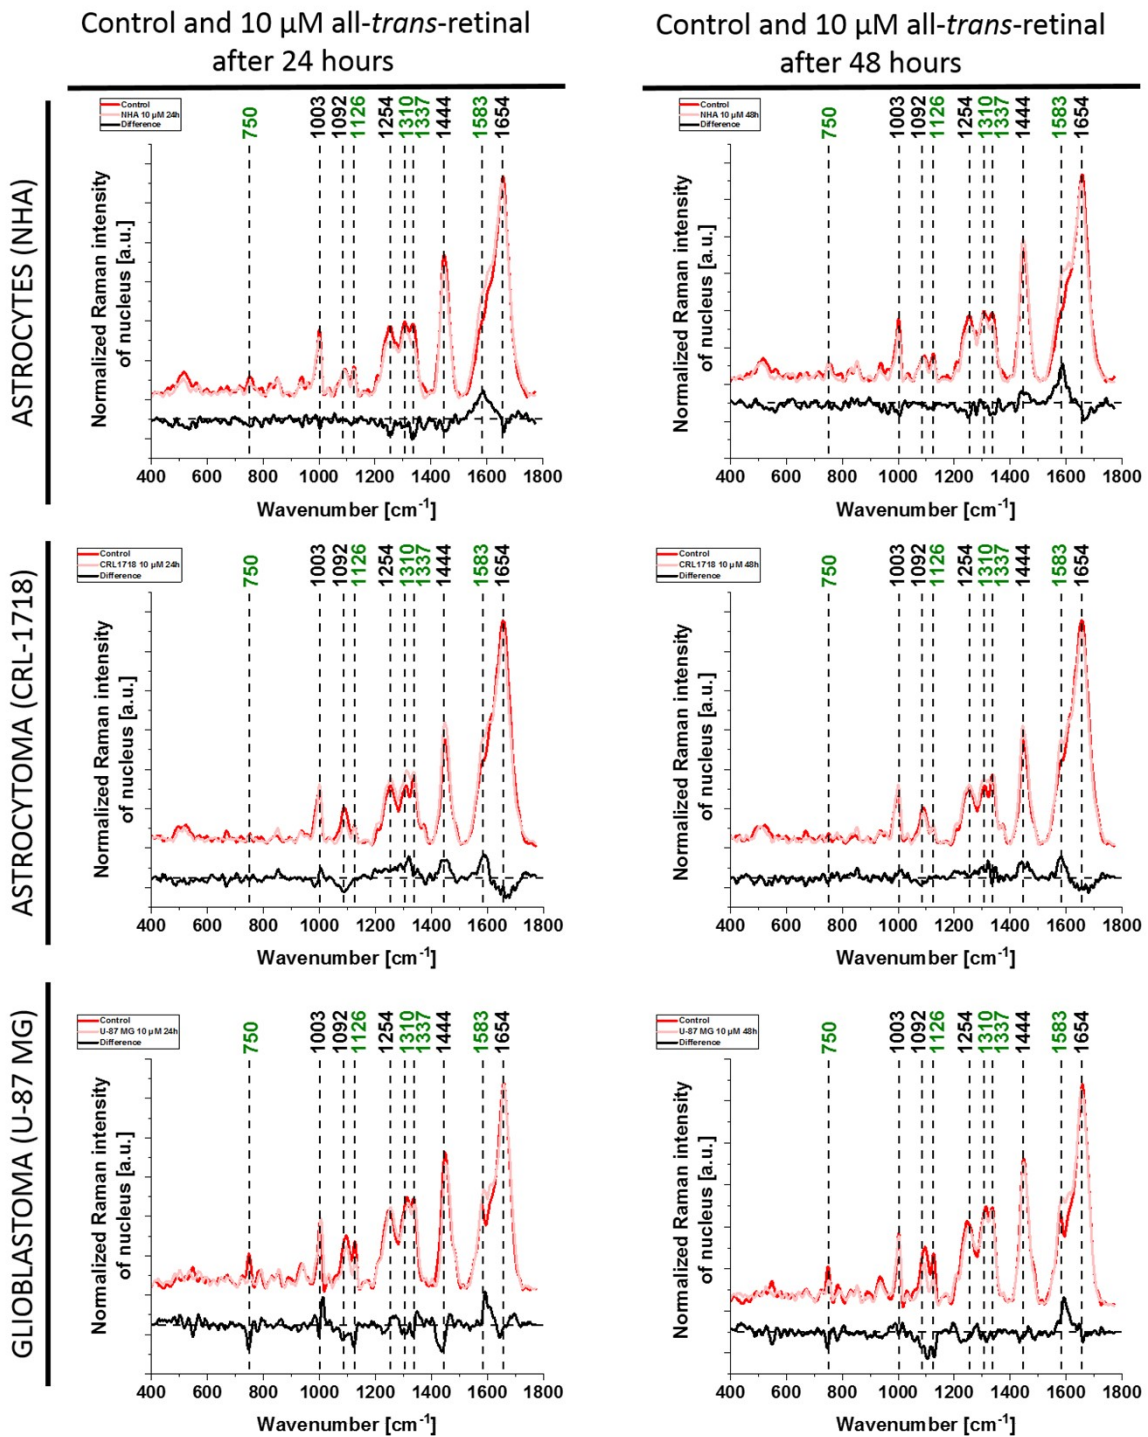

**Figure S2.** Average and difference spectra for cell nucleus from NHA, CRL-1718 and U-87 MG cell lines, control and supplemented with 10  $\mu\text{M}$  all-*trans*-retinal of two incubation times: 24 (left) and 48 (right) hours. Red – average from control cells, light red – average from cells supplemented with 10  $\mu\text{M}$  all-*trans*-retinal, black – difference spectrum (supplemented – control).

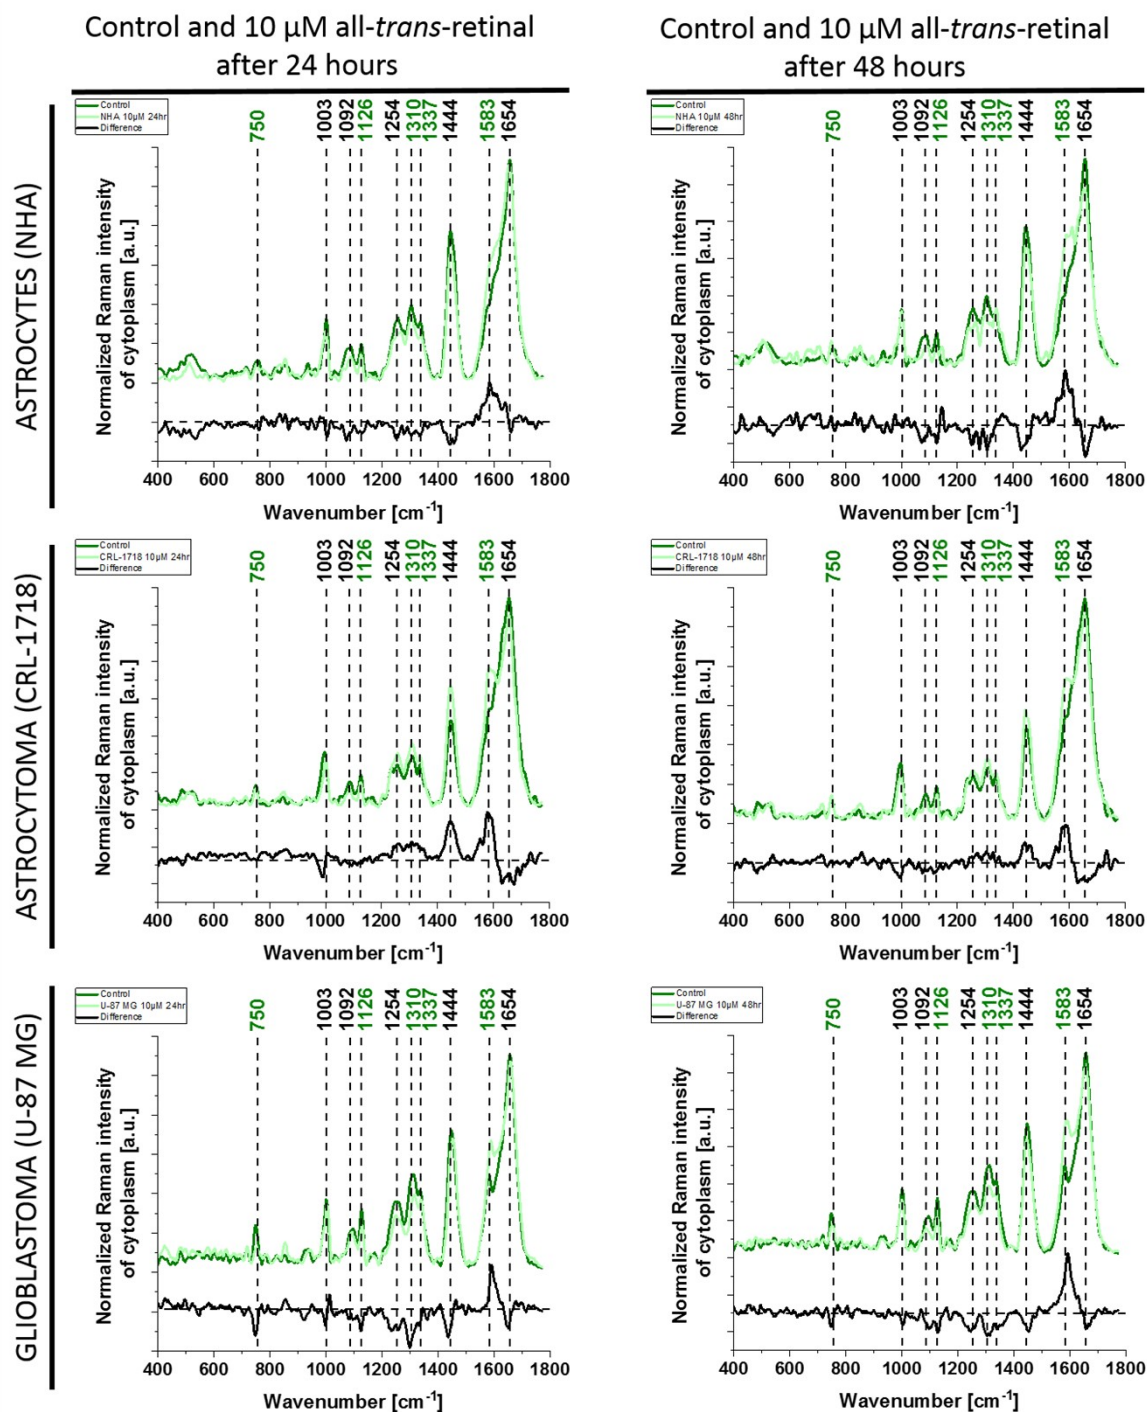

**Figure S3.** Average and difference spectra for cell cytoplasm from NHA, CRL-1718 and U-87 MG cell lines, control and supplemented with 10  $\mu\text{M}$  all-*trans*-retinal of two incubation times: 24 (left) and 48 (right) hours. Dark green – average from control cells, light green – average from cells supplemented with 10  $\mu\text{M}$  all-*trans*-retinal, black – difference spectrum (supplemented – control).
